# Supplementary material for: Superhalogen doping: a new and effective approach to design materials with excellent static and dynamic NLO responses
Source: Royal Society of Chemistry journal article supplement (doi:10.1039/d0nj02291h), 2020-01-01
Supplement: d0nj02291h1.pdf [file d0nj02291h1.pdf]

**Superhalogen doping: A new and effective approach to design materials  
with excellent static and dynamic NLO response**

Hasnain Sajid, Faizan Ullah, Muhammad Yar, Khurshid Ayub, Tariq Mahmood\*

Department of Chemistry, COMSATS University Islamabad, Abbottabad Campus,  
Abbottabad-22060, Pakistan

\*To whom correspondence can be addressed: E-mail: mahmood@cuiatd.edu.pk (T. M)

Supplementary information

$\text{BeF}_3@n\text{CF}$

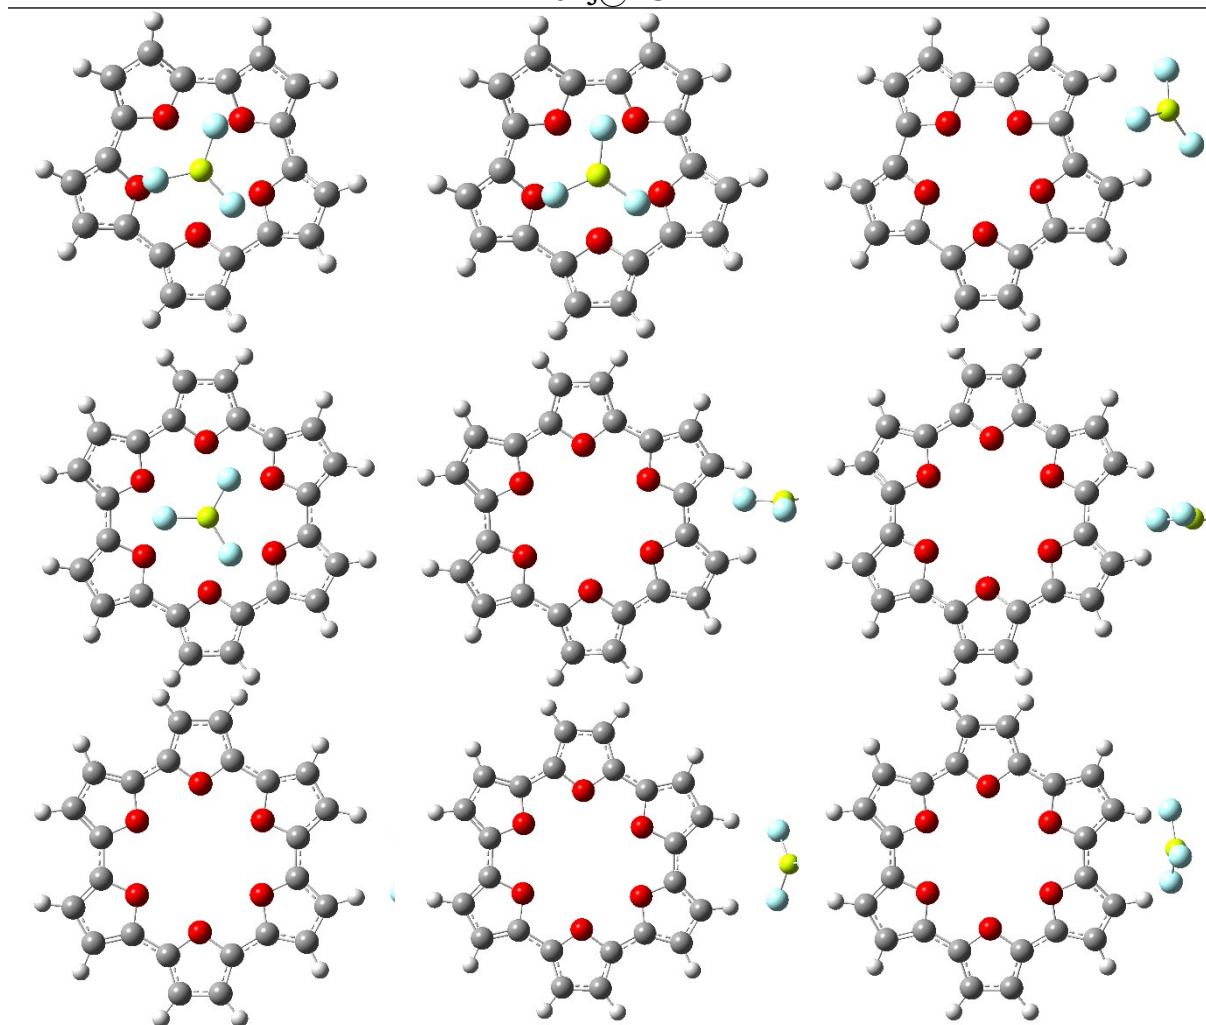

**Fig. S1a.** All the possible optimized geometries of  $\text{BeF}_3@n\text{CF}$  complexes.

---

$\text{BeCl}_3@n\text{CF}$

---

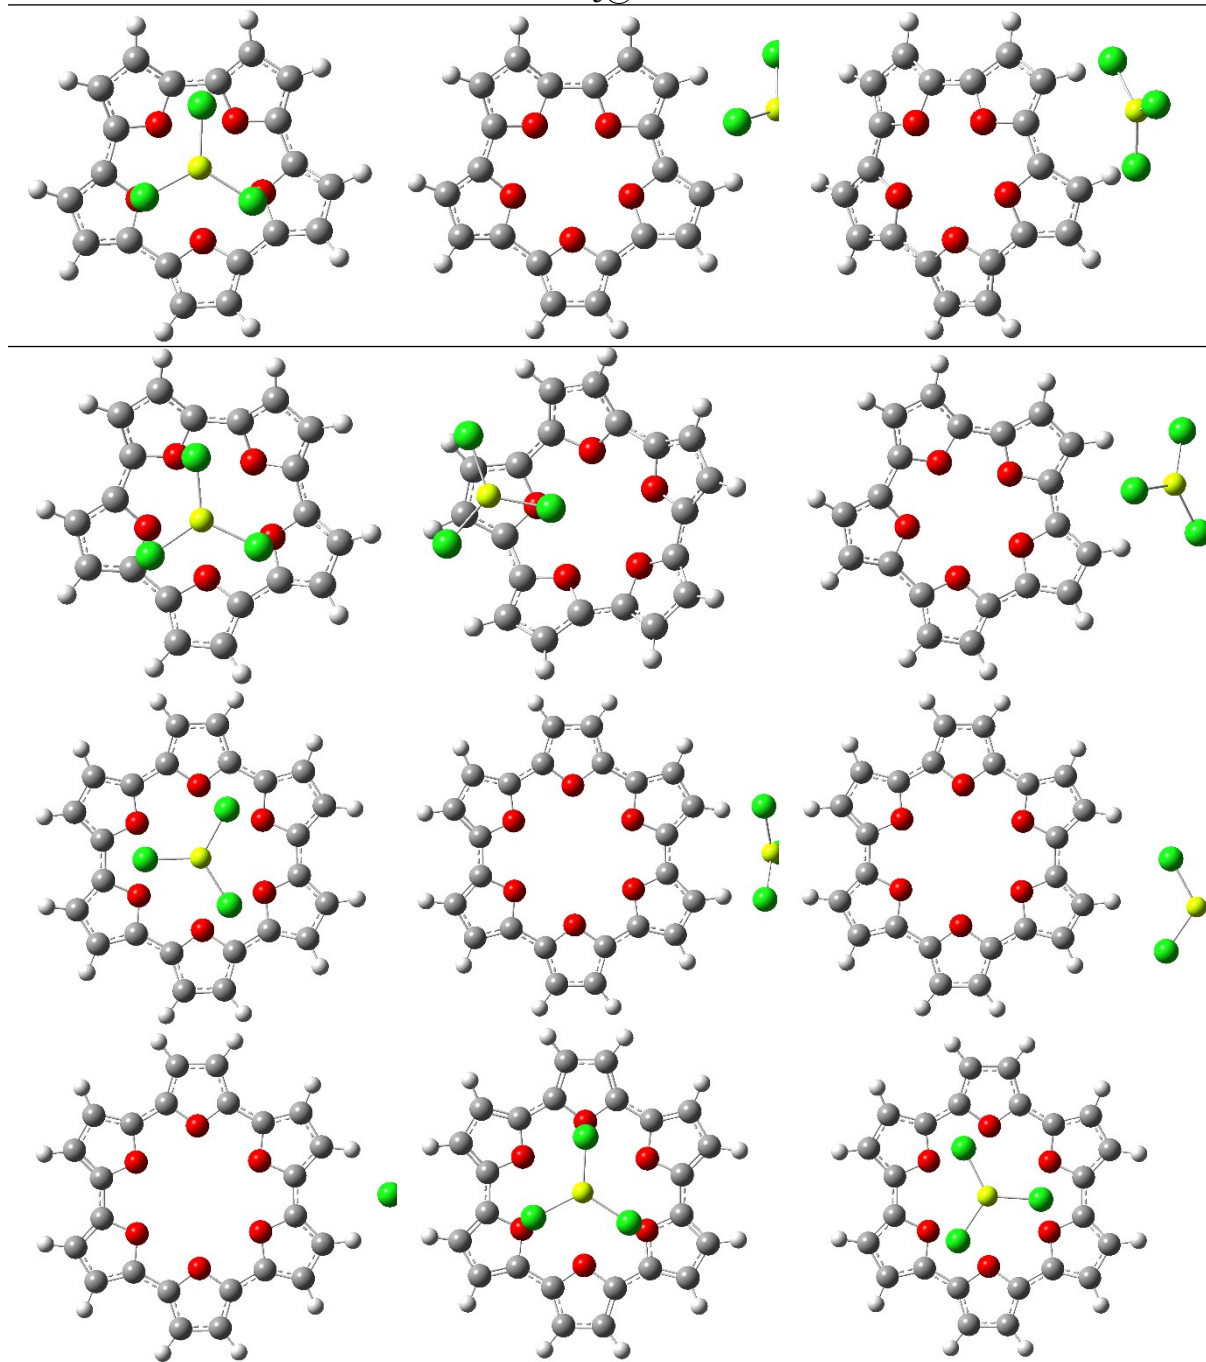

**Fig. S1b.** All the possible optimized geometries of  $\text{BeCl}_3@n\text{CF}$  complexes.

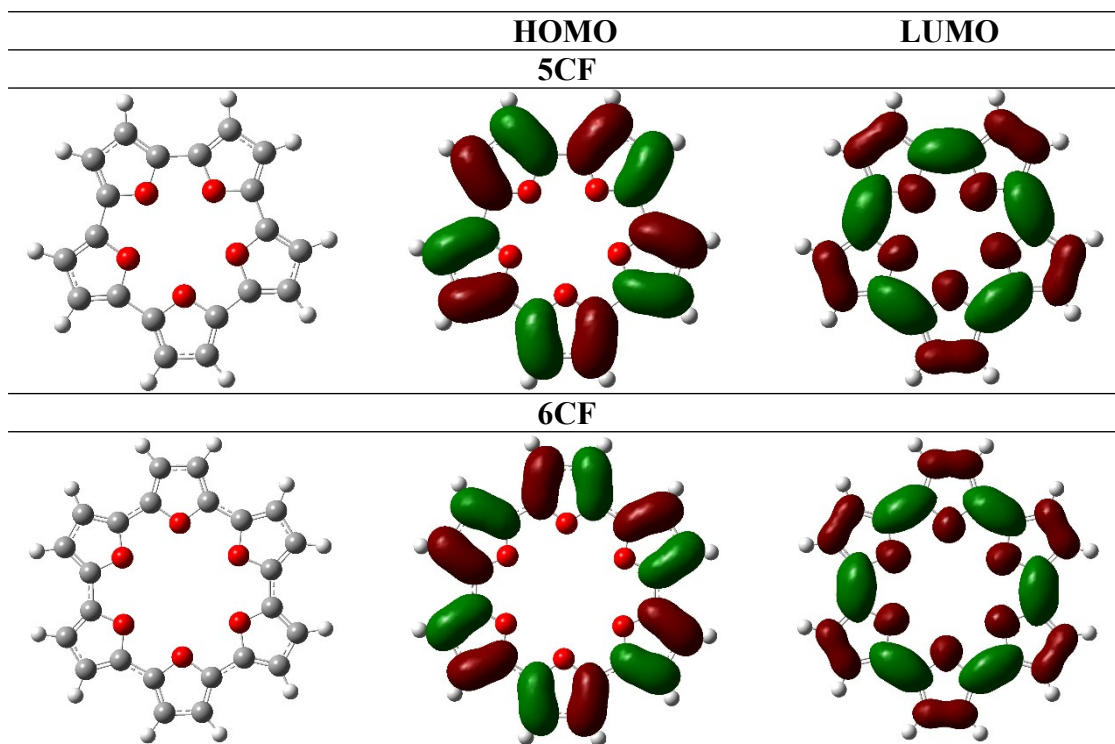

Figure S2. HOMO and LUMO orbitals of bare nCF

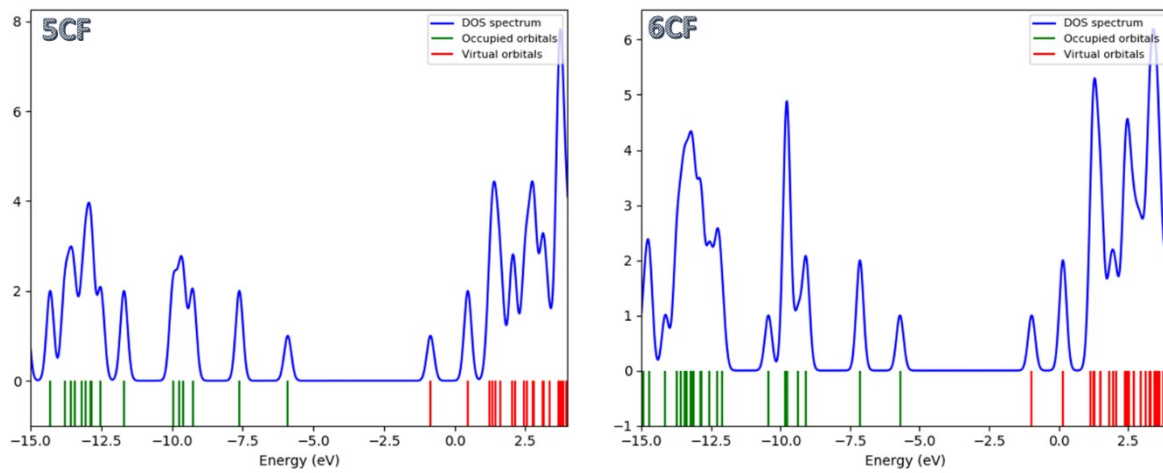

**Figure S3.** DOS spectra of isolated nCF.

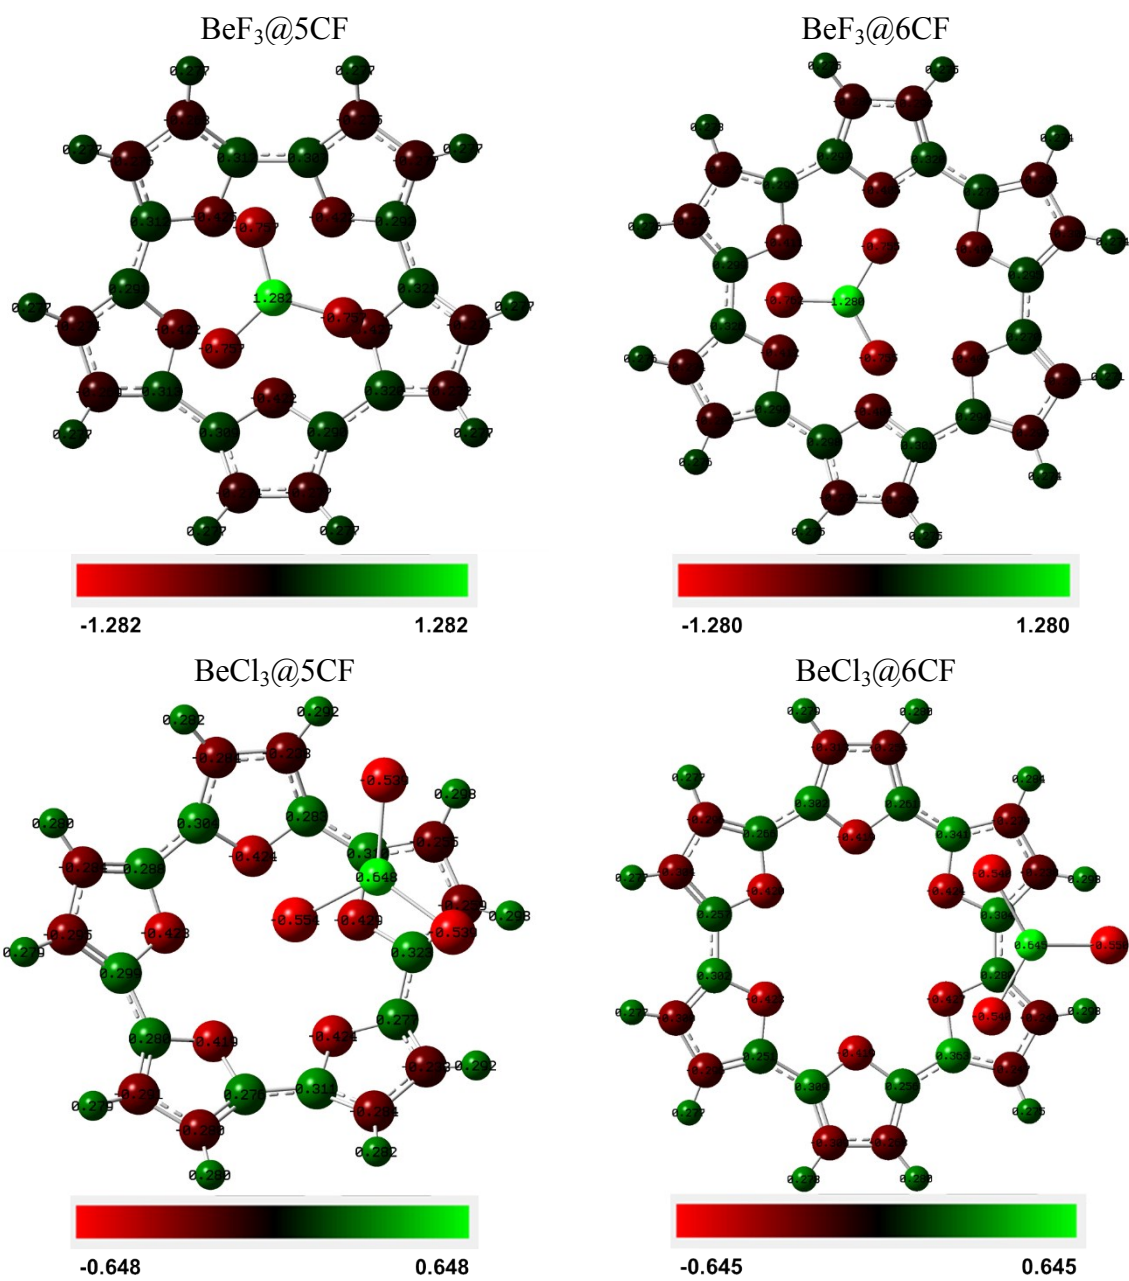

**Figure S4.** Charge distribution in different molecular region of complexes.
